# Supplementary material for: Portable Electrochemical DNA Sensors Based on Gene Amplification Reactions to Screen and Identify Pathogen and SNPs
Source: MDPI journal article supplement (doi:10.3390/s22051865), 2022-02-26
Supplement: s1 [file s1]

Supplementary Materials Figure S1

Features and advantages of screen printed electrodes

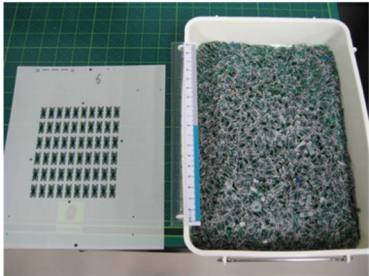

Mass productive, low cost, disposable

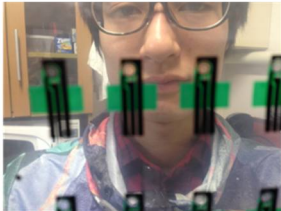

Transparent PET

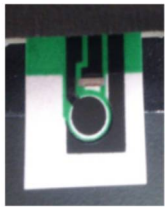

Paper

Variety of material substrates

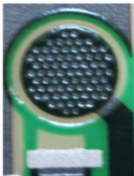

A large number of micro chambers (nL-pL) on the electrode

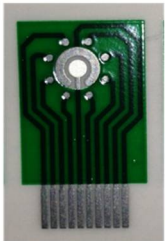

Eight working electrodes

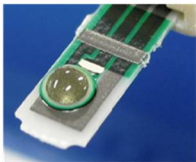

One drop retention type

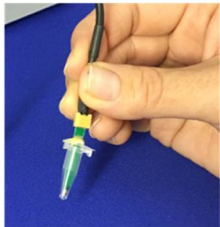

Small PCR tube

Supplementary Materials Table S1

Comparison between electrochemical and culture results regarding estimate of MRSA number in clinical samples [19]

| Sample                                                                          | Estimated MRSA number(cells/mL) | Culture results |
|---------------------------------------------------------------------------------|---------------------------------|-----------------|
| A                                                                               | $3.8 \times 10^5$               | ++              |
| B                                                                               | Negative                        | -               |
| C                                                                               | $1.0 \times 10^5$               | +               |
| +: < 100 colonies /plate, ++: 100-500 colonies/plate, +++: 500> colonies /plate |                                 |                 |

## Supplementary Materials Table S2

### Electrochemical RT-LAMP tests with patient samples

| Patient sample | Immunochromatography | RT-LAMP             | Patient sample | Immunochromatography | RT-LAMP     |
|----------------|----------------------|---------------------|----------------|----------------------|-------------|
| T1             | (B+)                 | (B+)                | M53            | (-)                  | (-)         |
| T2             | (-)                  | (-)                 | M54            | (-)                  | (-)         |
| T3             | (-)                  | (-)                 | M55            | (-)                  | (-)         |
| T6             | (B+)                 | (-)                 | M57            | (-)                  | A/H3N2+     |
| T14            | (-)                  | (-)                 | M64            | (-)                  | (-)         |
| T15            | (A+)                 | A/H3N2+             | M65            | (-)                  | (-)         |
| T16            | (-)                  | (-)                 | M66            | (-)                  | A/H3N2+     |
| T17            | (-)                  | (-)                 | M68            | (-)                  | (-)         |
| T18            | (-)                  | (-)                 | M69            | (-)                  | A/H3N2+     |
| T20            | (-)                  | (-)                 | M70            | (-)                  | (-)         |
| T22            | (-)                  | (-)                 | M71            | (A+)                 | A/H3N2+     |
| M1             | (-)                  | (-)                 | M72            | (-)                  | (-)         |
| M8             | (-)                  | (-)                 | U1             | (A+)                 | A/H3N2+     |
| M10            | (-)                  | (-)                 | U2             | (A+,B+)              | A/H3N2+, B+ |
| M11            | (-)                  | (-)                 | U3             | (-)                  | (-)         |
| M12            | (-)                  | (-)                 | U4             | (-)                  | A/H3N2+     |
| M21            | (-)                  | (-)                 | U6             | (-)                  | (-)         |
| M26            | (-)                  | (-)                 | U8             | (-)                  | (-)         |
| M40            | (-)                  | (-)                 |                |                      |             |
| M42            | (-)                  | (-)                 |                |                      |             |
| M43            | (-)                  | (-)                 |                |                      |             |
| M45            | (-)                  | (-)                 |                |                      |             |
| M46            | (-)                  | (-)                 |                |                      |             |
| M47            | (-)                  | (-)                 |                |                      |             |
| M51            | (-)                  | (-)                 |                |                      |             |
| M52            | (-)                  | A/H3N2+(RT-PCRでもA+) |                |                      |             |

Yellow boxes indicated negative by immunochromatography and positive by electrochemical RT-LAMP

### Supplementary Materials Table S3

#### Apolipoprotein gene (ApoE) polymorphism and risk of Alzheimer disease [22]

| Genotypes | SNP positions      |                    | Nucleotides |   |     |   | (Relative Risk of Onset) |
|-----------|--------------------|--------------------|-------------|---|-----|---|--------------------------|
|           | 334<br>(Cys112Arg) | 472<br>(Arg158Cys) | 334         |   | 472 |   |                          |
|           |                    |                    | T           | C | T   | C |                          |
| E 2/2     | —T—                | —T—                | +           | — | +   | — | (0.6 )                   |
| E 2/3     | —T—                | —T—                | +           | — | +   | — |                          |
|           | —T—                | —C—                |             |   |     |   |                          |
| E 2/4     | —T—                | —T—                | +           | + | +   | + | (3.2 )                   |
|           | —C—                | —C—                |             |   |     |   |                          |
| E 3/3     | —T—                | —C—                | +           | — | —   | + | (1.0 )                   |
|           | —T—                | —C—                |             |   |     |   |                          |
| E 3/4     | —T—                | —C—                | +           | + | —   | + | (3.2 )                   |
|           | —C—                | —C—                |             |   |     |   |                          |
| E 4/4     | —C—                | —C—                | —           | + | —   | + | (11.6 )                  |
|           | —C—                | —C—                |             |   |     |   |                          |

### Supplementary Materials Table S4

#### Electrochemical results with real human samples [22]

| Cys112Arg (T/T)     |       |                           |   | Cys112Arg (C/C)     |       |                           |  | Arg158Cys (T/T)     |       |                           |  | Arg158Cys (C/C)     |       |                           |       | ApoE genotype |
|---------------------|-------|---------------------------|---|---------------------|-------|---------------------------|--|---------------------|-------|---------------------------|--|---------------------|-------|---------------------------|-------|---------------|
| Anodic peak/nA (SD) |       | DNA detected <sup>a</sup> |   | Anodic peak/nA (SD) |       | DNA detected <sup>a</sup> |  | Anodic peak/nA (SD) |       | DNA detected <sup>a</sup> |  | Anodic peak/nA (SD) |       | DNA detected <sup>a</sup> |       |               |
| B-C                 |       |                           |   | A-C                 |       |                           |  | E-F                 |       |                           |  | D-F                 |       |                           |       |               |
| 1                   | 78.33 | 2.31                      | + | 95.64               | 1.55  | —                         |  | 106.75              | 6.89  | —                         |  | 73.32               | 2.47  | +                         | E3/E3 |               |
| 2                   | 73.78 | 2.06                      | + | 73.29               | 2.43  | +                         |  | 102                 | 3.605 | —                         |  | 80.36               | 1.71  | +                         | E3/E4 |               |
| 3                   | 79.6  | 1.59                      | + | 69.95               | 2.94  | +                         |  | 98.33               | 1.29  | —                         |  | 77.22               | 2.43  | +                         | E3/E4 |               |
| 4                   | 76.67 | 1.155                     | + | 79.76               | 1.763 | +                         |  | 103.56              | 2.157 | —                         |  | 68.67               | 2.58  | +                         | E3/E4 |               |
| 5                   | 73.77 | 3.276                     | + | 69.62               | 2.44  | +                         |  | 109.4               | 1.357 | —                         |  | 58.5                | 1.87  | +                         | E3/E4 |               |
| 6                   | 72.45 | 2.52                      | + | 78.99               | 1.3   | +                         |  | 101.5               | 2.871 | —                         |  | 77.5                | 0.619 | +                         | E3/E3 |               |
| 7                   | 73.47 | 2.64                      | + | 81.31               | 0.814 | +                         |  | 80.315              | 1.96  | +                         |  | 75.87               | 3.85  | +                         | E2/E4 |               |
| 8                   | 80.98 | 0.541                     | + | 98.45               | 2.61  | —                         |  | 102.93              | 3.42  | —                         |  | 65.86               | 1.143 | +                         | E3/E3 |               |
| 9                   | 77.24 | 3.19                      | + | 75.11               | 0.88  | +                         |  | 106.26              | 1.686 | —                         |  | 72.26               | 3.159 | +                         | E3/E4 |               |
| 10                  | 75.51 | 1.52                      | + | 76.02               | 1.82  | +                         |  | 68.28               | 1.91  | +                         |  | 70.43               | 6.1   | +                         | E2/E4 |               |
